# Supplementary material
Source: HighWire-hosted journal article supplement (http://jnnp.bmjjournals.com/highwire/filestream/197106/field_highwire_adjunct_files/1/Spanish_translation_main_paper.pdf)
Supplement: Spanish_translation_main_paper.pdf [file Spanish_translation_main_paper.pdf]

Acceso abierto

- ▶ El material suplementario está publicado únicamente online. Para verlo por favor visite la revista online (<http://dx.doi.org/10.1136/jnnp-2014-309255>)

Vea las afiliaciones numeradas al final del artículo.

Correspondencia a Glenn Nielsen, Sobell Department of Motor Neuroscience & Movement Disorders, UCL Institute of Neurology, Box 146, Queen Square, London WC1N 3GB, UK; [g.nielsen@ucl.ac.uk](mailto:g.nielsen@ucl.ac.uk)

Recibido el 19 de agosto del 2014

Revisado el 15 de octubre de 2014

Aceptado el 13 de Noviembre del 2014

Para citar: Nielsen G, Stone J, Matthews A, et al. J Neurol Neurosurg Psychiatry 2015;86:1113–1119.

***"This abstract has been translated and adapted from the original English-language content. Translated content is provided on an "as is" basis. Translation accuracy or reliability is not guaranteed or implied. BMJ is not responsible for any errors and omissions arising from translation to the fullest extent permitted by law, BMJ shall not incur any liability, including without limitation, liability for damages, arising from the translated text."***

Fisioterapia para trastornos motores funcionales: consenso de recomendaciones.

Glenn Nielsen,<sup>1,2</sup> Jon Stone,<sup>3</sup> Audrey Matthews,<sup>4</sup> Melanie Brown,<sup>4</sup> Chris Sparkes,<sup>5</sup> Ross Farmer,<sup>6</sup> Lindsay Masterton,<sup>7</sup> Linsey Duncan,<sup>7</sup> Alisa Winters,<sup>3</sup> Laura Daniell,<sup>3</sup> Carrie Lumsden,<sup>7</sup> Alan Carson,<sup>8</sup> Anthony S David,<sup>9,10</sup> Mark Edwards<sup>1</sup>

## RESUMEN

**Introducción:** Los pacientes con trastornos motores funcionales (TMF) incluyendo la debilidad y la parálisis son derivados con frecuencia a los fisioterapeutas. Cada vez existe más evidencia de que la fisioterapia es un tratamiento efectivo, pero la literatura existente contiene descripciones limitadas acerca de en qué debe consistir la fisioterapia y no hay información para producir unas guías basadas en la evidencia. Nuestro propósito es resolver esta carencia mediante la presentación de unas recomendaciones para el tratamiento con fisioterapia.

**Métodos:** Se celebró una reunión con fisioterapeutas, neurólogos y neuropsiquiatras con extensa experiencia en el tratamiento de TMF. Se elaboró un consenso de recomendaciones basado en la evidencia existente y en la propia experiencia.

**Resultados:** Recomendamos que el tratamiento con fisioterapia se base en un marco etiológico biopsicosocial. El tratamiento debe abordar las creencias sobre la enfermedad, la atención dirigida a uno mismo y los patrones de movimientos anormales a través de un proceso de educación, reentrenamiento del movimiento y estrategias de autocuidado en un contexto positivo y sin enjuiciamiento. Describimos ejemplos específicos de cada estrategia para los diferentes síntomas.

**Conclusiones:** La fisioterapia juega un papel fundamental en el manejo multidisciplinar de los pacientes con TMF. Parece que son ciertas técnicas fisioterápicas específicas las que son útiles en los TMF y las que son candidatas y requieren una evaluación prospectiva. Los procesos que incluyen la derivación, el tratamiento y alta a los fisioterapeutas deben considerarse cuidadosamente como parte del conjunto de medidas para el tratamiento.

## Introducción

Muchos consideran la fisioterapia para los trastornos motores funcionales (TMF) como una parte útil del tratamiento y cada vez hay más evidencia sobre su uso, incluyendo un ensayo controlado randomizado.<sup>1-3</sup> Sin embargo, existe muy poca descripción, incluso en esos estudios, de en qué consiste realmente esa fisioterapia. Existe la opinión general de que cuando la fisioterapia para los TMF funciona, no sólo lo hace por “guardar las apariencias con el paciente” (otra forma de decir que los elementos precisos del tratamiento son irrelevantes puesto que la recuperación está completamente bajo el control del paciente). Por el contrario, existe cada vez más evidencia de que el tipo de fisioterapia es importante y que una fisioterapia dirigida basada en un razonamiento lógico y en una comunicación transparente puede interferir en los mecanismos que producen y mantienen los TMF. Por lo tanto, nos reunimos un grupo de profesionales sanitarios multidisciplinar y geográficamente diverso para crear una serie de recomendaciones con el contenido de la fisioterapia para los TMF que puedan actuar como guía para otros y formen la base de futuros estudios terapéuticos.

Utilizamos el término TMF para describir síntomas como debilidad, parálisis, temblor y distonía que no están causados por enfermedades neurológicas estándar. Los TMF se encuentran dentro de las causas más comunes por las que la gente solicita una valoración neurológica.<sup>4</sup> Se asocian a niveles altos de discapacidad y malestar, su pronóstico se considera malo y el gasto económico que suponen es elevado.<sup>5-7</sup>

Una encuesta reciente realizada a los neurofisioterapeutas del Reino Unido,<sup>8</sup> reveló que la mayoría (77%) veía pacientes con TMF y estaban bastante interesados en tratar pacientes con TMF. Sin embargo, identificaron como barreras para el tratamiento la falta de apoyo por parte de otros colegas no fisioterapeutas así como unas infraestructuras para el servicio inadecuadas. Además, valoraron su conocimiento sobre el tema como bajo si lo comparaban con otras enfermedades que veían con frecuencia. Esto no es sorprendente, dada la falta de evidencia y descripciones de las técnicas de tratamiento. En una revisión sistemática reciente acerca de la fisioterapia para los TMF,<sup>3</sup> se identificaron únicamente 29 estudios con un total combinado de 373 pacientes (únicamente siete estudios tenían más de 10 participantes). A pesar de las limitaciones, estos estudios muestran resultados prometedores para la fisioterapia (y rehabilitación física), con mejorías entre el 60-70% de los pacientes. Por otro lado, un estudio randomizado publicado recientemente con 60 pacientes mostró unos resultados muy alentadores de una intervención consistente en un ingreso hospitalario de 3 semanas de duración con rehabilitación física en pacientes con trastorno de la marcha funcional (mejora de 7 puntos en una escala de 15 puntos).<sup>1</sup> Sin embargo, la literatura contiene muy poca información práctica sobre cómo llevar a cabo la fisioterapia en un individuo con TMF. No existen recomendaciones publicadas. En el presente artículo pretendemos solventar esta carencia proporcionando recomendaciones para la práctica de la fisioterapia. Introducimos el modelo fisiopatológico para los TMF en el que basamos nuestras estrategias terapéuticas y proporcionamos

sugerencias prácticas para el trayecto del paciente, desde la derivación del mismo hasta el tratamiento y el alta.

## DESARROLLO DE LAS RECOMENDACIONES

En el año 2013, un terapeuta ocupacional, fisioterapeutas, neurólogos y neuropsiquiatras, todos ellos con una extensa experiencia en el tratamiento de pacientes con TMF, se reunieron en Edimburgo, Reino Unido, para producir un conjunto de recomendaciones para el tratamiento con fisioterapia. Esto no es explícitamente una guía debido a la ausencia de evidencia disponible. Por el contrario, las recomendaciones buscan combinar la evidencia existente en la literatura<sup>13</sup> con la experiencia de profesionales de la salud en un documento que pueda formar la base de futuros estudios y pueda ser ampliado conforme la evidencia vaya surgiendo.

Este documento publicado es la versión abreviada de una versión más extensa que se encuentra disponible como material suplementario, que contiene más ejemplos acerca de las formas de discutir ciertas situaciones y ejemplos con casos específicos.

## MODELO DE LOS SÍNTOMAS Y BASE RACIONAL PARA LA FISIOTERAPIA

Nuestro marco etiológico es un marco biopsicosocial donde una mezcla heterogénea de factores predisponentes, precipitantes y perpetuantes son considerados y formulados, aceptando que los factores relevantes pueden diferir de unos pacientes a otros (tabla1).

Más específicamente, basamos nuestras recomendaciones para los TMF en un modelo acerca de los mecanismos de los síntomas, que pueden ser más homogéneos entre pacientes. En este modelo, los TMF se conciben como patrones de movimiento, involuntarios pero aprendidos, inducidos por un foco de atención anormalmente dirigida a uno mismo. Enfatizamos el hecho de que esto es frecuentemente desencadenado por eventos físicos o psicológicos como lesiones, enfermedades, dolor y disociación con pánico y es mediado por las creencias y las expectativas sobre la enfermedad.<sup>9-11</sup> Los sucesos estresantes, los trastornos emocionales y los rasgos de personalidad son relevantes a la hora de comprender y tratar algunos pacientes con TMF, especialmente aquellos casos donde existe un nexo claro entre afecto/ansiedad y exacerbación de los síntomas. Sin embargo, nuestras recomendaciones, de acuerdo con los criterios revisados en la quinta edición del Manual Estadístico de Trastornos Mentales (DSM-5), se alejan de asumir que el “estrés reciente” y un modelo puramente psicológico son esenciales para comprender y tratar a los pacientes con TMF.

## FISIOTERAPIA COMO PARTE DEL ABORDAJE MULTIDISCIPLINAR DE LOS TMF

La fisioterapia es una de las muchas intervenciones que pueden ayudar a los TMF. Otras incluyen la simple educación, el tratamiento psicológico, la terapia ocupacional, la logopedia, la hipnosis, los tratamientos farmacológicos y la rehabilitación vocacional. Sin embargo, recomendamos que la

fisioterapia para pacientes con discapacidad física, siendo conscientes de las complejidades de los TMF, tome un papel primordial en el tratamiento de muchos pacientes. Además, sugerimos que cuando el tratamiento psicológico esté indicado, en ocasiones puede llegar a ser más efectivo si se realiza en conjunto o después de una fisioterapia exitosa.

Proponemos que la fisioterapia tiene un papel importante en normalizar las creencias sobre la enfermedad, reducir la atención focalizada en uno mismo y romper los patrones de movimiento anormales aprendidos mediante:

1. La Educación
2. La demostración de que el movimiento normal puede ocurrir
3. Reentrenando el movimiento desviando la atención
4. Cambiando los factores maladaptativos en relación a los síntomas

#### DIAGNÓSTICO, EXPLICACIÓN POR PARTE DEL MÉDICO Y DERIVACIÓN A FISIOTERAPIA

Las recomendaciones para la valoración y el correcto diagnóstico de los TMF están disponibles en otros artículos.<sup>14-15</sup> Existe un consenso entre los profesionales de la salud acerca de la importancia de una explicación clara del diagnóstico al paciente y sus cuidadores por parte del médico<sup>16-17</sup> (detallado más adelante). Los resultados más importantes derivados de la explicación que parecen facilitar la fisioterapia son:

1. La comprensión por parte del paciente de que los profesionales de la salud implicados en su tratamiento aceptan que tienen un problema genuino (no “imaginado” o “inventado”).
2. La comprensión por parte del paciente de que su problema tiene el potencial de ser reversible (el problema en la función del sistema nervioso, no un daño en el sistema nervioso) y que por tanto puede responder a la fisioterapia.

De manera ideal, la derivación del médico a la fisioterapia para TMF debería contener una descripción de lo que se le ha dicho al paciente y lo que debe ser compartido con el paciente. Poner en conocimiento otros síntomas relevantes como el dolor, la fatiga, los problemas de memoria y concentración, la ansiedad y la depresión es importante.

No todos los pacientes con TMF son adecuados para fisioterapia. Nosotros recomendamos que se cumplan los siguientes criterios:

1. Los pacientes deben haber recibido un diagnóstico sin ambigüedades por parte del médico, preferiblemente usando las recomendaciones de arriba.
2. El paciente debe tener confianza o estar abierto al diagnóstico de TMF. La fisioterapia tiene pocas probabilidades de ayudar a alguien que cree que el diagnóstico es incorrecto.
3. El paciente desea mejorar y puede identificar objetivos.

Los pacientes que no cumplen todos estos criterios también se pueden beneficiar de la fisioterapia. Por ejemplo, ayudarles a entender el diagnóstico o en el manejo de la discapacidad cuando la rehabilitación ha fallado. No todos los pacientes con un inicio agudo de los TMF requerirán tratamiento específico. Una proporción experimentarán remisiones espontáneas, pero los estudios de seguimiento han demostrado que la mayoría de los pacientes permanecerán sintomáticos a lo largo del tiempo.<sup>6,18</sup> Dado que la cronicidad de los síntomas se relaciona con un peor pronóstico, recomendamos derivar a los pacientes adecuados pronto a fisioterapia. La pregunta de en qué cuantía una mejoría espontánea podría ser la causante del beneficio ofrecido por la fisioterapia (o cualquier otro tratamiento) es una de las que necesita responderse vía ensayos clínicos randomizados.

## VALORACIÓN FISIOTERÁPICA

Esto se discute en detalle en el material suplementario online. Los elementos claves son: ganar comprensión en detalle de los síntomas experimentados; su efecto en el funcionamiento diario, la comprensión que tiene el paciente acerca del diagnóstico dado y su nivel de confianza en el mismo; definir los objetivos para el tratamiento fisioterápico y ganarse su confianza. Si en este estadio queda bastante claro que el paciente tiene ideas muy firmes sobre la posibilidad de diagnósticos alternativos o no desea participar en la fisioterapia, entonces puede no ser apropiado proceder. El uso de un contrato de tratamiento, como en otras patologías, puede tener beneficioso a la hora de impulsar la mejoría o ayudar en el alta de pacientes que no se están beneficiando del tratamiento.

## COMPONENTES DE LA FISIOTERAPIA

Los principios generales que se aplican en el tratamiento de la mayoría de los pacientes con TMF se muestran en la caja 1.

### Educación

El fisioterapeuta, como el médico, se encuentra en una posición excelente para mejorar la comprensión del trastorno por parte del paciente durante el tratamiento. La explicación debe ser construida a partir de la explicación completa del médico que lo deriva. Algunos ingredientes útiles incluyen:

1. El uso del término trastorno del movimiento/debilidad de una extremidad/parálisis/temblor/distonía/mioclónia *funcional*. La base racional para preferir este término sobre “psicógeno”, trastorno conversivo u otras denominaciones se explica en otros artículos.<sup>19</sup>
2. Reconocer que los síntomas son reales, que no son imaginados o inventados (o lo que es lo mismo, que les crees).
3. Reconocer que estos síntomas son frecuentes y que el médico que les trata los ve con frecuencia.

4. Explicar que los síntomas pueden mejorar, que el problema tiene que ver con el funcionamiento del sistema nervioso y no con un daño irreversible del sistema nervioso.
5. Explicar cómo los TMF se diagnostican usando signos clínicos positivos que demuestran que el movimiento normal es posible (ver más abajo).
6. Explicar que existe una variedad importante de factores que pueden estar implicados en desencadenar los síntomas, incluyendo enfermedades físicas y lesiones, y que los factores psicológicos como la ansiedad, depresión y traumas pueden ser también relevantes.
7. Introducir el papel de la fisioterapia como “reentrenamiento” del sistema nervioso para ayudar a ganar control sobre el movimiento.
8. Puede ser importante discutir otros términos que se usan para denominar a los TMF y el hecho de que muchos profesionales de la salud tienen actitudes ambivalentes o negativas sobre los TMF.

Esta información debe ser reforzada con información escrita u online (por ejemplo <http://www.neurosintomas.org>). En los pacientes en los que las dudas sobre el diagnóstico persisten, éstas a menudo mejoran si la terapia progresa de manera exitosa.

#### SIGNOS POSITIVOS DE LOS TMF QUE DEMUESTRAN POTENCIAL PARA EL MOVIMIENTO NORMAL

La demostración de que el movimiento normal puede ocurrir (o que el movimiento anormal puede cesar) altera las expectativas sobre el trastorno del movimiento, y puede ser una forma eficaz de convencer a un paciente escéptico (y a su familia) de que el diagnóstico del TMF es correcto y el problema es potencialmente reversible.<sup>20</sup> Se han descrito diferentes signos clínicos que muestran el movimiento normal y diferencian a los síntomas funcionales de otras enfermedades neurológicas. Éstos se usan como parte del diagnóstico para identificar a los TMF de manera positiva, en vez de que éstos sean un diagnóstico de exclusión. Algunos de esos signos se enumeran en la tabla 2.

#### REENTRENAR EL MOVIMIENTO DESVIANDO LA ATENCIÓN

El reto para los fisioterapeutas es demostrar movimiento normal en el contexto de una actividad significativa como es caminar. La clave es minimizar la atención focalizada en uno mismo mediante la distracción o evitando que el paciente controle cognitivamente el movimiento y estimulando los movimientos generados de manera automática. Esto se puede llevar a cabo alterando el foco de atención motora, como pensar en una parte diferente del movimiento o intentado movimientos rápidos, rítmicos, no familiares o impredecibles.

La distracción puede ocurrir a nivel cognitivo, por ejemplo, trasladando la atención lejos del miembro afecto con conversación, música o tareas mentales mediante la aritmética. Sin embargo, se prefieren los ejercicios orientados a tareas específicas (tabla 3) porque a menudo son más efectivos, se traducen directamente en una mejoría funcional y fomentan el control motor implícito. Se pueden generar movimientos automáticos significativos y actividad muscular sujetando peso, con respuestas posturales automáticas como sentándose en superficies inestables (por ejemplo, la

terapia con balones). En la tabla 3 se incluyen más sugerencias de como demostrar movimiento normal en diferentes situaciones y técnicas específicas para síntomas individuales.

## OTRAS ESTRATEGIAS DE TRATAMIENTO CON FISIOTERAPIA

### Uso del lenguaje

Usar un lenguaje adecuado puede ser importante. Las explicaciones que eliminan eficazmente la culpa, el fallo o la implicación de la voluntariedad son útiles. Por ejemplo: “tu cerebro está monitorizando tu cuerpo de un modo anormal”, o “las pruebas han mostrado que tus músculos tienen la capacidad de moverse”, en vez de “puedes mover tus músculos.”

Las palabras usadas al preguntar al paciente que se mueva también pueden ser importantes. El lenguaje puede desencadenar movimiento automático, por ejemplo, “permite a tu pierna que venga hacia adelante” puede producir movimiento mejor que “da un paso/mueve tu pierna hacia adelante.” Durante las sesiones de fisioterapia, uno puede encontrar pistas o mensajes de lo que es más útil para cada paciente.

### Ejercicio – no específico y graduado

Se debe considerar el ejercicio graduado y no específico como parte de cualquier programa de rehabilitación general para mejorar la intolerancia al ejercicio y los síntomas de dolor crónico y fatiga. Hay cierta evidencia para ello en los TMF.<sup>21</sup> El éxito aquí depende de conseguir la intensidad correcta para prevenir la exacerbación de los síntomas y promover el cumplimiento y la adherencia al programa. Estudios randomizados de gran tamaño muestral han demostrado que el ejercicio graduado mejora los resultados en pacientes con fatiga crónica<sup>22</sup>-un acompañante frecuente de los TMF (ver más adelante)- y es muy probable que sea beneficioso para muchos pacientes.

### Visualización

Algunos pacientes pueden encontrar útil las técnicas de visualización durante el movimiento. Esto puede que funcione como una forma de distracción donde el paciente imagina una tarea motora más fluida o un escenario más agradable mientras se encuentra realizando los ejercicios. La visualización puede ser contraproducente si fomenta la focalización de la atención sobre uno mismo durante el movimiento.

### Espejos y video

Los espejos y el uso del video pueden ser de ayuda proporcionando retroalimentación a los pacientes acerca de sus movimientos, posturas o patrones de la marcha que a menudo difieren significativamente de cómo ellos imaginan que son.<sup>23</sup> Moverse en frente de un espejo puede ayudar también a distraer la atención para dejar de monitorizar sensaciones corporales.



## Hipersensibilidad y alodinia

Las intervenciones dirigidas a la desensibilización pueden ser apropiadas cuando la hipersensibilidad y la alodinia están presentes. Éstas pueden incluir la estimulación sensorial graduada, los ejercicios/movimientos graduados y la electroestimulación transcutánea de los nervios (TENS).

## Diario de rehabilitación o libro de trabajo

Completar un diario de rehabilitación o libro de trabajo con la ayuda del fisioterapeuta puede ser una técnica útil para ayudar al paciente a reflexionar, recordar y reforzar la información ofrecida durante la fisioterapia. El paciente puede usar el diario para realizar un seguimiento de sus objetivos, medidas de resultados y logros, estrategias de tratamiento, el plan de actividades, etc. Un diario puede ser de ayuda para mejorar el cumplimiento del tratamiento, y estimular la responsabilidad para el autocuidado.

## Manejo del dolor y de la fatiga

El dolor y la fatiga persistente o crónica son frecuentes en los pacientes con TMF y a menudo tienen un papel en precipitar y mantener los síntomas. Preferiblemente, el paciente debe entender que esos síntomas se engloban dentro de un solo problema (con muchos síntomas) y no son enfermedades separadas. El núcleo de los tratamientos para el dolor y la fatiga basados en la evidencia, como se sugiere para los TMF son, (1) el cambio en las creencias sobre la enfermedad como secundaria a un daño a potencialmente reversible; (2) reconocer que el dolor crónico no se correlaciona con daño y (3) cambiar los factores maladaptativos, tales como romper los ciclos de exceso y ausencia de actividad con ejercicio graduado. Puede ser útil reformular el dolor como otro ejemplo de que el sistema nervioso está enviando señales incorrectas, como los TMF, y pueden mejorar mediante el reentrenamiento (esto es, estableciendo una retroalimentación sensitivo-motora más normal). Existen guías basadas en la evidencia de buena calidad y recursos útiles para pacientes para la educación en el manejo del dolor.<sup>24-25</sup>

## Provisión de equipamiento, ayudas adaptativas, férulas o escayolas

Recomendamos evitar las ayudas adaptativas siempre que sea posible, especialmente en las presentaciones agudas. La provisión de un equipamiento y de ayudas adaptativas puede favorecer formas de funcionar y conductas que dificultan el retorno del movimiento normal y resultan en cambios secundarios como debilidad y dolor.

En algunos casos, el uso de equipamiento es necesario por razones pragmáticas (asegurar la seguridad después de lesiones comprobadas), en cuyo caso se deben considerar temporales y ofrecer un plan para ir disminuyendo su uso. Recomendamos asegurarse de que el paciente comprende los efectos potencialmente nocivos del equipamiento y se debe establecer un plan para

minimizarlo (por ejemplo, asegurar que el paciente con una silla de rueda tiene la oportunidad de levantarse tanto como sea seguro y posible). Para pacientes con TMF que no han respondido al tratamiento, un equipo adaptativo puede mejorar la independencia y la calidad de vida y debe ser considerado.

Recomendamos con fervor evitar la inmovilización del paciente con férulas, escayolas o dispositivos similares. En un estudio sobre la distonía fija (funcional) (n=103), un 15% desarrollaron el problema o éste se deterioró significativamente durante o después de una inmovilización con escayola. En ningún caso la inmovilización con escayola resultó en una mejoría duradera.<sup>26</sup>

Electroterapias- estimulación eléctrica funcional, biorretroalimentación con electromiografía, estimulación magnética transcraneal y TENS

El uso de la electricidad en el tratamiento de los TMF viene de lejos y se remonta al siglo diecinueve.<sup>27 28</sup> No recomendaríamos ninguna de esas terapias como tratamiento aislado. La electroestimulación funcional (FES) puede ser un tratamiento adyuvante útil, particularmente en pacientes con trastorno de la marcha funcional.<sup>29</sup> Idealmente, la FES debería utilizarse como una modalidad terapéutica y no como una ayuda permanente para la movilidad. La estimulación muscular eléctrica (no necesariamente la FES) puede utilizarse para demostrar el movimiento normal y cambiar las creencias sobre la enfermedad. Puede funcionar también a nivel de reaprendizaje motor.

La biorretroalimentación con electromiografía (EMG) se puede usar para abordar las creencias sobre la enfermedad y puede ser útil para entrenar el movimiento en la debilidad funcional<sup>30</sup> o la relajación muscular en el temblor o las posturas fijas.

Estudios recientes con estimulación magnética transcraneal (TMS) ofrecen algunos resultados prometedores.<sup>31</sup> Sin embargo, ninguno de los estudios publicados fueron controlados y ninguno incluía una exposición a protocolos de TMS que pudieran considerarse como neuromoduladores. Lo más probable es que el efecto placebo y la sugestión juega un papel importante en los pacientes donde el tratamiento es exitoso, aunque la TMS puede jugar un papel específico, como la hipnosis o la sedación terapéutica,<sup>32 33</sup> en ser capaces de demostrar movimiento en extremidades que no pueden moverse de otro modo.<sup>34</sup> La TMS, como la FES, pueden ser por tanto técnicas adicionales útiles para algunos pacientes, y que fisioterapeutas especializados podrían incorporar en su práctica clínica.

La TENS, capaz de producir una sensación de hormigueo sin dolor o contracción muscular, ha sido descrita como tratamiento para los pacientes con TMF.<sup>35</sup> Nosotros hemos utilizado máquinas de TENS en pacientes con anestesia funcional o hipoestesia marcada incrementando la intensidad de los estímulos a niveles altos para que se hagan más consciente de la sensación.

Caídas y conductas autolesivas

Se considera con frecuencia que las caídas en los pacientes con TMF tienen un riesgo bajo de lesión, en particular el patrón frecuente de “descensos controlados”. Cuando éste es el caso, se debe informar al personal de esta posibilidad y puede ser conveniente para el paciente tomar un riesgo (aparentemente) mayor. La situación es más compleja cuando existe una historia de autolesión que a veces se puede manifestar como una caída. El riesgo de lesión durante las sesiones de fisioterapia es más alto. En este caso, las decisiones clínicas se deben tomar con el apoyo de un equipo multidisciplinar (MDT). El fisioterapeuta puede ayudar a manejar esta situación adelantándose al riesgo de lesiones por caídas, documentar las discusiones y las decisiones clínicas en la historia clínica y animando al paciente a sentirse parte de la toma de decisiones.

## TÉCNICA QUE NO RECOMENDAMOS

Existen ciertos abordajes para la rehabilitación descritos en la literatura que aconsejamos no utilizar como terapias de primera línea. Estos son:

1. Engañar al paciente de cualquier manera. Por ejemplo, decirle al paciente que la falta de recuperación significa que los síntomas son imaginarios<sup>36</sup> incluyendo el uso de tratamiento con placebos engañosos.
2. Confinar al paciente a una silla de ruedas fuera de las sesiones de terapia mientras el patrón de la marcha permanezca afectado por los síntomas funcionales.<sup>37</sup>
3. Manejar los síntomas funcionales con cirugía. Los procedimientos quirúrgicos han sido reportados como precipitante frecuentes de los TMF.<sup>10 26</sup>

Algunos pacientes con distonía fija funcional buscan ser amputados, lo que normalmente resulta en empeoramiento de los síntomas.<sup>38</sup> La cirugía con alargamiento de tendones podría tener un papel en los casos donde existan contracturas fijas confirmadas tras evaluación bajo anestesia; sin embargo, esto se acompaña del riesgo de exacerbar los síntomas funcionales y de dolor crónico.

## PARÁMETROS DEL TRATAMIENTO

Se desconocen el marco, la duración y la intensidad óptima del tratamiento y parece probable que éstos varíen en relación a la severidad, cronicidad y posiblemente de la presentación/fenotipo de los síntomas. Los programas que requieren un ingreso hospitalario permiten que los factores sociales y ambientales que pueden estar implicados en desencadenar o mantener los síntomas se reduzcan y permite tratamientos de mayor intensidad. El tratamiento domiciliario puede abordar los problemas reales a los que el paciente se enfrenta una vez es dado de alta, que pueden resultar en un empeoramiento de los síntomas. Los programas que requieren una atención ambulatoria tienen las ventajas de poder proveer el servicio durante un período de tiempo más largo. Un abordaje en forma de “cuidados escalonados” es la situación ideal, donde la complejidad del tratamiento puede escalarse dependiendo de las necesidades del paciente.<sup>39</sup>

## MEDIDAS DEL RESULTADO

Ésta es una pregunta sin resolver en los estudios de los TMF. Se han usado cambios en la discapacidad (por ejemplo, usando la Escala de Independencia Funcional),<sup>40-43</sup> calidad de vida (por ejemplo, la SF-36), la impresión clínica global (escala de 5 puntos)<sup>2,44</sup> y el coste-beneficio. Las escalas objetivas que se usan en investigación para los TMF, como la Escala de evaluación de los Trastornos del Movimiento Psicógenos,<sup>45</sup> tienen un valor cuestionable tanto en la práctica clínica como en investigación debido a que los síntomas de los TMF son muy variables.

## ALTA Y SEGUIMIENTO/FINALIZACIÓN DEL TRATAMIENTO

Acordar el proceso de alta al inicio del tratamiento (contrato/acuerdo de tratamiento) es útil ya que ayuda a ambas partes a planificar la finalización del tratamiento y limita los problemas que potencialmente pueden asociarse. Se debe elaborar un plan de autocuidado que incluya estrategias y ejercicios que hayan sido de ayuda durante la terapia, objetivos futuros con marcos temporales realistas y estrategias para prevenir que conductas no beneficiosas aparezcan de nuevo (por ejemplo, programar actividades de manera graduada, planificar el ejercicio para evitar ciclos de exceso y ausencia de actividad física). Los contratiempos y las recaídas de los síntomas después del tratamiento son comunes y es importante que el paciente esté preparado para ello. Una visita de seguimiento unos meses tras el alta puede ser beneficiosa para revisar y reajustar los objetivos así como para solucionar problemas que hayan podido aparecer.

Un informe de alta para el paciente, para el médico de familia y para otros médicos relevantes puede tener un valor terapéutico si se utiliza como una oportunidad para reforzar la información que se le ha dado al paciente y para educar a otros en el diagnóstico y en el tratamiento.

## TMF Y LA COMORBILIDAD PSIQUIÁTRICA

La comorbilidad psiquiátrica asociada es generalmente más frecuente en el grupo de los TMF que en la población general. Para algunos pacientes, la comorbilidad psiquiátrica puede estar presente y ser relevante al inicio de los TMF y requiere un tratamiento psiquiátrico específico. Puede ser necesario que éste se realice antes (por ejemplo, cuando el individuo tiene riesgo de autolesionarse o es reacio a involucrarse en la rehabilitación física), durante o después de la fisioterapia. Nuestra experiencia es que la psicoterapia (en particular, el tratamiento para la ansiedad y depresión) es a menudo más exitosa una vez se haya producido cierta mejoría durante la fisioterapia.

## LIMITACIONES

Este documento tiene como objetivo abordar el problema de la falta de información y evidencia para los fisioterapeutas que tratan pacientes con TMF. Somos conscientes de que existen varias limitaciones en estas recomendaciones. La más significativa es que están basadas en evidencia limitada. Nuestro objetivo es únicamente ofrecer consejo para fisioterapeutas. Coincidimos en que la fisioterapia es sólo una parte del tratamiento multidisciplinar, y que otras disciplinas como la

terapia ocupacional o las terapias psicológicas pueden tener un papel igual o mayor en determinados pacientes. Los pacientes con TMF forman parte de un grupo heterogéneo y cada paciente tendrá factores únicos que contribuyan a sus síntomas.

## CONCLUSIÓN/RESUMEN

Los TMF son complejos y su etiología es multifactorial. Los pacientes con este diagnóstico por consiguiente son también heterogéneos. El tratamiento debe reflejar esto también. La fisioterapia dirigida a restablecer el movimiento y la función ha demostrado validez, empieza a estar basada en la evidencia y es bien aceptada por los pacientes. Actualmente, se emplean recursos para la fisioterapia en pacientes con TMF, sin embargo no existen infraestructuras ni información para que los fisioterapeutas puedan planificar el tratamiento. El modelo biopsicosocial y las recomendaciones que presentamos están dirigidas a ayudar a los fisioterapeutas para planificar tratamientos individualizados que aborden el problema que contribuye en los síntomas del paciente. Un abordaje en forma de cuidados escalonados es importante para poder escalar el tratamiento cuando sea necesario.

## Afiliaciones de los autores

1 Sobell Department of Motor Neuroscience and Movement Disorders, UCL Institute of Neurology, London, UK

2 Therapy Services, The National Hospital for Neurology and Neurosurgery, London, UK

3 Department Clinical Neurosciences, Western General Hospital, Edinburgh, UK

4 Institute of Neurological Sciences, Southern General Hospital, Glasgow, UK

5 Therapy Services, The Ipswich Hospital NHS Trust, Ipswich, UK

6 South London & Maudsley NHS Foundation Trust, London, UK

7 Community Rehabilitation and Brain Injury Service, West Lothian, UK

8 Department of Clinical Neurosciences, University of Edinburgh, Edinburgh, UK

9 Institute of Psychiatry, King's College London, London, UK

10 National Institute of Health Research Biomedical Research Centre at the South London & Maudsley NHS Foundation Trust and Institute of Psychiatry KCL, London, UK

Contribuciones GN, JS and ME prepararon el primer boceto del manuscrito. Todos los autores estaban presentes en la reunión del consenso y estuvieron de acuerdo con el contenido que se ha incluido en el manuscrito final. GN, JS and ME revisaron el manuscrito. Todos los autores revisaron el manuscrito revisado

Financiación GN está financiado por un NIHR Clinical Doctoral Research Fellowship. ME está financiado por una beca de investigador clínico NIHR. JS está financiado por un NHS Scotland NRS Career Research Fellowship.

Conflicto de intereses Ninguno

Procedencia y revisión a pares No encargado; revisado por pares externos

Acceso abierto Este es un artículo de acceso abierto distribuido de acuerdo con la licencia Creative Commons Attribution Non Comercial (CC BY-NC 4.0), que permite a otros distribuir, mezclar, adaptar, extender este trabajo de manera no comercial, y autorizar los trabajos derivados en términos diferentes, siempre y cuando el trabajo original sea citado de manera adecuada y el uso no sea comercial. Ver: <http://creativecommons.org/licenses/by-nc/4.0/>

## REFERENCIAS

1. Jordbru AA, Smedstad LM, Klungsøyr O, et al. Psychogenic gait disorder: a randomized controlled trial of physical rehabilitation with one-year follow-up. *J Rehabil Med* 2014;46:181–7.
2. Czarnecki K, Thompson JM, Seime R, et al. Functional movement disorders: successful treatment with a physical therapy rehabilitation protocol. *Parkinsonism Relat Disord* 2012;18:247–51.
3. Nielsen G, Stone J, Edwards MJ. Physiotherapy for functional (psychogenic) motor symptoms: a systematic review. *J Psychosom Res* 2013;75:93–102.
4. Stone J, Carson A, Duncan R, et al. Who is referred to neurology clinics? The diagnoses made in 3781 new patients. *Clin Neurol Neurosurg* 2010;112:747–51.
5. Carson A, Stone J, Hibberd C, et al. Disability, distress and unemployment in neurology outpatients with symptoms ‘unexplained by organic disease’. *J Neurol Neurosurg Psychiatry* 2011;82:810–13.
6. Gelauff J, Stone J, Edwards M, et al. The prognosis of functional (psychogenic) motor symptoms: a systematic review. *J Neurol Neurosurg Psychiatry* 2014;85:220–6.
7. Birmingham SL, Cohen A, Hague J, et al. The cost of somatisation among the working-age population in England for the year 2008–2009. *Ment Health Fam Med* 2010;7:71.
8. Edwards MJ, Stone J, Nielsen G. Physiotherapists and patients with functional (psychogenic) motor symptoms: a survey of attitudes and interest. *J Neurol Neurosurg Psychiatry* 2012;83:655–8.
9. Edwards MJ, Adams RA, Brown H, et al. A Bayesian account of ‘hysteria’. *Brain* 2012;135:3495–512.
10. Pareés I, Kojovic M, Pires C, et al. Physical precipitating factors in functional movement disorders. *J Neurol Sci* 2014;338:174–7.
11. Stone J, Warlow C, Sharpe M. Functional weakness: clues to mechanism from the nature of onset. *J Neurol Neurosurg Psychiatry* 2012;83:67–9.
12. Stone J, LaFrance WC Jr, Brown R, et al. Conversion disorder: current problems and potential solutions for DSM-5. *J Psychosom Res* 2011;71:369–76.
13. Stone J, Carson A. Functional and dissociative (psychogenic) neurological symptoms. In: Daroff RB, Fenichel GM, Jankovic J, Mazziotta J. eds. *Bradley’s neurology in clinical practice*. Philadelphia: Elsevier, 2012. pp. 2147–62.
14. Edwards MJ, Bhatia KP. Functional (psychogenic) movement disorders: merging mind and brain. *Lancet Neurol* 2012;11:250–60.
15. Stone J. The bare essentials: functional symptoms in neurology. *Pract Neurol* 2009;9:179–89.
16. Duncan R, Razvi S, Mulhern S. Newly presenting psychogenic nonepileptic seizures: incidence, population characteristics, and early outcome from a prospective audit of a first seizure clinic. *Epilepsy Behav* 2011;20:308–11.
17. Espay AJ, Goldenhar LM, Voon V, et al. Opinions and clinical practices related to diagnosing and managing patients with psychogenic movement disorders: an international survey of movement disorder society members. *Mov Disord* 2009;24:1366–74.

18. McKenzie P, Oto M, Russell A, et al. Early outcomes and predictors in 260 patients with psychogenic nonepileptic attacks. *Neurology* 2010;74:64–9.
19. Edwards MJ, Stone J, Lang AE. From psychogenic movement disorder to functional movement disorder: it's time to change the name. *Mov Disord* 2013;29:849–52.
20. Stone J, Edwards M. Trick or treat? Showing patients with functional (psychogenic) motor symptoms their physical signs. *Neurology* 2012;79:282–4.
21. Dallochio C, Arbasino C, Klersy C, et al. The effects of physical activity on psychogenic movement disorders. *Mov Disord* 2010;25:421–5.
22. White P, Goldsmith K, Johnson A, et al. Comparison of adaptive pacing therapy, cognitive behaviour therapy, graded exercise therapy, and specialist medical care for chronic fatigue syndrome (PACE): a randomised trial. *Lancet* 2011;377:823–36.
23. Stone J, Gelauff J, Carson A. A “twist in the tale”: altered perception of ankle position in psychogenic dystonia. *Mov Disord* 2012;27:585–6.
24. Butler DS, Moseley GL. *Explain pain*. Adelaide: Noigroup Publications, 2003.
25. Nijs J, Paul van Wilgen C, Van Oosterwijck J, et al. How to explain central sensitization to patients with ‘unexplained’ chronic musculoskeletal pain: practice guidelines. *Man Ther* 2011;16:413–18.
26. Schrag A, Trimble M, Quinn N, et al. The syndrome of fixed dystonia: an evaluation of 103 patients. *Brain* 2004;127:2360–72.
27. Adrian E, Yealland LR. The treatment of some common war neuroses. *Lancet* 1917;189:867–72.
28. Tatu L, Bogousslavsky J, Moulin T, et al. The “torpillage” neurologists of World War I electric therapy to send hysterics back to the front. *Neurology* 2010;75:279–83.
29. Khalil T, Abdel-Moty E, Asfour S, et al. Functional electric stimulation in the reversal of conversion disorder paralysis. *Arch Phys Med Rehabil* 1988;69:545–7.
30. Fishbain D, Goldberg M, Khalil T, et al. The utility of electromyographic biofeedback in the treatment of conversion paralysis. *Am J Psychiatry* 1988;145:1572.
31. Pollak TA, Nicholson TR, Edwards MJ, et al. A systematic review of transcranial magnetic stimulation in the treatment of functional (conversion) neurological symptoms. *J Neurol Neurosurg Psychiatry* 2014;85:191–7.
32. Moene FC, Spinhoven P, Hoogduin KA, et al. A randomized controlled clinical trial of a hypnosis-based treatment for patients with conversion disorder, motor type. *Int J Clin Exp Hypn* 2003;51:29–50.
33. Stone J, Hoeritzauer I, Brown K, et al. Therapeutic sedation for functional (psychogenic) neurological symptoms. *J Psychosom Res* 2014;76:165–8.
34. Garcin B, Roze E, Mesrati F, et al. Transcranial magnetic stimulation as an efficient treatment for psychogenic movement disorders. *J Neurol Neurosurg Psychiatry* 2013;84:1043–6.
35. Ferrara J, Stamey W, Strutt AM, et al. Transcutaneous electrical stimulation (TENS) for psychogenic movement disorders. *J Neuropsychiatry Clin Neurosci* 2011;23:141–8.
36. Shapiro AP, Teasell RW. Behavioural interventions in the rehabilitation of acute v. chronic non-organic (conversion/factitious) motor disorders. *Br J Psychiatry* 2004;185:140–6.
37. Trieschmann R, Stolov W, Montgomery E. An approach to the treatment of abnormal ambulation resulting from conversion reaction. *Arch Phys Med Rehabil* 1970;51:198–206.
38. Edwards MJ, Alonso-Canovas A, Schrag A, et al. Limb amputations in fixed dystonia: a form of body integrity identity disorder? *Mov Disord* 2011;26:1410–14.
39. Health Improvement Scotland. *Stepped care for functional neurological symptoms*. Edinburgh, 2012.  
[http://www.healthcareimprovementscotland.org/our\\_work/long\\_term\\_conditions/neurological\\_health\\_services/neurological\\_symptoms\\_report.aspx](http://www.healthcareimprovementscotland.org/our_work/long_term_conditions/neurological_health_services/neurological_symptoms_report.aspx) (accessed 17 Jul 2014).
40. Deaton AV. Treating conversion disorders: Is a pediatric rehabilitation hospital the place? *Rehabil Psychol* 1998;43:56. 41.

41. Ness D. Physical therapy management for conversion disorder: case series. *J Neurol Phys Ther* 2007;31:30–9.
42. Speed J. Behavioral management of conversion disorder: retrospective study. *Arch Phys Med Rehabil* 1996;77:147–54.
43. Watanabe TK, O’Dell MW, Togliatti TJ. Diagnosis and rehabilitation strategies for patients with hysterical hemiparesis: a report of four cases. *Arch Phys Med Rehabil* 1998;79:709–14.
44. Sharpe M, Walker J, Williams C, et al. Guided self-help for functional (psychogenic) symptoms: a randomized controlled efficacy trial. *Neurology* 2011;77:564–72.
45. Hinson VK, Cubo E, Comella CL, et al. Rating scale for psychogenic movement disorders: scale development and clinimetric testing. *Mov Disord* 2005;20:1592

Tabla 1 Conjunto de mecanismos y factores etiológicos potenciales en pacientes con trastornos motores funcionales

| Factores                                                                   | Biológicos                                                                                                                                                                                                                                            | Psicológicos                                                                                                                                                                                                                                                  | Sociales                                                                                                                                                                                                                                                      |
|----------------------------------------------------------------------------|-------------------------------------------------------------------------------------------------------------------------------------------------------------------------------------------------------------------------------------------------------|---------------------------------------------------------------------------------------------------------------------------------------------------------------------------------------------------------------------------------------------------------------|---------------------------------------------------------------------------------------------------------------------------------------------------------------------------------------------------------------------------------------------------------------|
| Factores que actúan en todas las etapas<br>Vulnerabilidades predisponentes | <ul style="list-style-type: none"> <li>▶ Enfermedad “orgánica”</li> <li>▶ Historia de síntomas funcionales previos</li> <li>▶ Factores genéticos que afectan a la personalidad</li> <li>▶ Vulnerabilidades biológicas del sistema nervioso</li> </ul> | <ul style="list-style-type: none"> <li>▶ Trastorno emocional</li> <li>▶ Trastorno de personalidad</li> <li>▶ Percepción de experiencias adversas en la infancia</li> <li>▶ Rasgos de personalidad</li> <li>▶ Falta de apego/forma de afrontamiento</li> </ul> | <ul style="list-style-type: none"> <li>▶ Problemas socio económicos</li> <li>▶ Acontecimientos vitales y dificultades</li> <li>▶ Negligencia/abuso infantil</li> <li>▶ Problemas en la dinámica familiar</li> <li>▶ Copia de los síntomas de otros</li> </ul> |
| Mecanismos precipitantes                                                   | <ul style="list-style-type: none"> <li>▶ Estado o acontecimiento fisiológico anormal (p.e, efecto secundario de medicamentos, hiperventilación, privación de sueño, parálisis del sueño)</li> <li>▶ Daño físico/dolor</li> </ul>                      | <ul style="list-style-type: none"> <li>▶ Percepción de acontecimientos vitales como negativos o inesperados</li> <li>▶ Episodio agudo de disociación/ataque de pánico</li> </ul>                                                                              |                                                                                                                                                                                                                                                               |
| Factores perpetuantes                                                      | <ul style="list-style-type: none"> <li>▶ Plasticidad de los circuitos motores y sensitivos (incluyendo dolor) del SNC que facilitan la aparición de</li> </ul>                                                                                        | <ul style="list-style-type: none"> <li>▶ Creencias sobre la enfermedad (paciente y familia)</li> <li>▶ Percepción de los síntomas como</li> </ul>                                                                                                             | Beneficios sociales derivados de la enfermedad<br>Disponibilidad de compensación legal                                                                                                                                                                        |



|                                                                        |                                                                                                                                                                                                                   |                                                                                                                                                                                                                             |                                                                                                                                                                                                                                  |
|------------------------------------------------------------------------|-------------------------------------------------------------------------------------------------------------------------------------------------------------------------------------------------------------------|-----------------------------------------------------------------------------------------------------------------------------------------------------------------------------------------------------------------------------|----------------------------------------------------------------------------------------------------------------------------------------------------------------------------------------------------------------------------------|
|                                                                        | <p>movimientos anormales</p> <ul style="list-style-type: none"> <li>▶ Desacondicionamiento</li> <li>▶ Anormalidades neuroendocrinas o inmunológicas parecidos a los que se ven en depresión y ansiedad</li> </ul> | <p>irreversibles</p> <ul style="list-style-type: none"> <li>▶ Sentirse no creídos</li> <li>▶ Percepción de que el movimiento causa daño</li> <li>▶ Evitar la provocación de los síntomas</li> <li>▶ Miedo a caer</li> </ul> | <p>Pruebas médicas pendientes o incertidumbre</p> <p>Dependencia excesiva en fuentes de información o afiliaciones grupales que refuerzan la creencia de que los síntomas son irreversibles y de naturaleza puramente física</p> |
| <p>Adaptado de Stone y Carson.13<br/>SNC, sistema nervioso central</p> |                                                                                                                                                                                                                   |                                                                                                                                                                                                                             |                                                                                                                                                                                                                                  |

**Caja 1 Principios generales del tratamiento con fisioterapia para los trastornos motores funcionales (TMF)**

- ▶ Crear confianza antes de retar/presionar al paciente.
- ▶ Proyectar confianza dejando claro que el fisioterapeuta sabe acerca de los TMF.
- ▶ Crear expectativas de mejoría.
- ▶ Comunicación abierta y consistente entre el equipo multidisciplinar y el paciente.
- ▶ Involucrar a la familia y cuidadores en el tratamiento.
- ▶ Limitar el tratamiento tocando al paciente. Al manejar al paciente, mejor facilitar que sujetar.
- ▶ Alentar el soporte temprano de peso. En la debilidad funcional la fuerza muscular cuando se explora al paciente en la cama no se correlaciona muy a menudo con la capacidad para mantenerse de pie.
- ▶ Fomentar la independencia y el autocuidado.
- ▶ Rehabilitación dirigida al objetivo centrándose en la función y el movimiento automático (por ejemplo, caminar) en vez de centrarse en la discapacidad (por ejemplo, la debilidad) y en el movimiento controlado (“que requiere atención completa”) (por ejemplo, ejercicios de estiramiento).
- ▶ Minimizar el refuerzo de patrones de movimientos y posturas maladaptativas.
- ▶ Evitar el uso de equipamiento adaptativo y apoyos para la movilidad (a pesar de que éstos no están siempre contraindicados).
- ▶ Evitar el uso de férulas y dispositivos para inmovilizar articulaciones.
- ▶ Reconocer y desafiar pensamientos y conductas no beneficiosas.
- ▶ Desarrollar un plan de autocuidado y prevención de recaídas.

Tabla 2 Signos clínicos que pueden mostrarse en un paciente con trastorno motor funcional para demostrar el diagnóstico y el potencial para reversibilidad y ejemplos de cómo discutirlo con los pacientes

|                                                                                                                                                                                                                                                                           |                                                                                                                                                                                                                                                                                                                                                                                                                                                                                                                                                                                           |
|---------------------------------------------------------------------------------------------------------------------------------------------------------------------------------------------------------------------------------------------------------------------------|-------------------------------------------------------------------------------------------------------------------------------------------------------------------------------------------------------------------------------------------------------------------------------------------------------------------------------------------------------------------------------------------------------------------------------------------------------------------------------------------------------------------------------------------------------------------------------------------|
| <p>Signo de Hoover<br/>                 Debilidad de la extensión de la cadera que se normaliza con la flexión de la cadera contralateral contra resistencia</p>                                                                                                          | <p>“Puedo ver que cuando estás intentando empujar la pierna hacia el suelo está débil. De hecho, cuando más lo intentas más débil se vuelve. Pero cuando estás levantando la otra pierna, ¿puedes sentir que el movimiento en tu pierna mala se normaliza? Tu pierna afectada funciona mejor cuando mueves tu pierna buena. Esto refleja que tu cerebro tiene dificultades para enviar mensajes a la pierna pero que el problema mejora cuando estás distraído e intentas mover tu otra pierna. Esto también nos muestra que la debilidad debe ser reversible/no causada por un daño”</p> |
| <p>Signo del abductor de la cadera<br/>                 Debilidad de la abducción de la cadera que se normaliza con la abducción de la cadera contralateral contra resistencia</p>                                                                                        | <p>Similar al signo de Hoover</p>                                                                                                                                                                                                                                                                                                                                                                                                                                                                                                                                                         |
| <p>Distracción y “arrastre” del temblor<br/>                 Detener el temblor pidiéndole al paciente que copie movimientos rítmicos o genere movimientos balísticos con la extremidad contralateral (golpear el dedo índice con el pulgar a diferentes velocidades)</p> | <p>“Cuando tratas de copiar el movimiento con tu mano buena, ¿puedes ver que el temblor en tu mano afecta mejora? Eso es típico del temblor funcional.</p>                                                                                                                                                                                                                                                                                                                                                                                                                                |

| Tabla 3 Ejemplo de técnicas para normalizar el movimiento en cada síntoma específico |                                                                                                                                                                                                                                                                                                                                                                                                                                                                                                                                                                                                                                                                                                                                                                                                                                                                                        |
|--------------------------------------------------------------------------------------|----------------------------------------------------------------------------------------------------------------------------------------------------------------------------------------------------------------------------------------------------------------------------------------------------------------------------------------------------------------------------------------------------------------------------------------------------------------------------------------------------------------------------------------------------------------------------------------------------------------------------------------------------------------------------------------------------------------------------------------------------------------------------------------------------------------------------------------------------------------------------------------|
| Síntoma                                                                              | Estrategia de Movimiento                                                                                                                                                                                                                                                                                                                                                                                                                                                                                                                                                                                                                                                                                                                                                                                                                                                               |
| Debilidad de la pierna                                                               | <p>Soportar peso pronto, con cada vez con menos apoyo sobre las extremidades superiores, por ejemplo apoyo con la “punta de los dedos”, evitar que el paciente soporte peso mediante apoyos para la marcha/superficies de soporte</p> <p>Levantarse en un ambiente seguro con balanceo de lado a lado</p> <p>Gatear con 4 puntos de soporte y luego con las dos rodillas</p> <p>Caminar en una cinta de correr (con o sin arneses para soportar el peso corporal y el retroalimentación de un espejo)</p>                                                                                                                                                                                                                                                                                                                                                                              |
| Debilidad del tobillo                                                                | <p>Provoca la dorsiflexión del tobillo pidiéndole al paciente que camine hacia atrás, con balanceo hacia adelante y atrás del cuerpo mientras se mantiene en bipedestación o pidiéndole al paciente que camine arrastrando sus pies, manteniendo la superficie plantar de cada pie en contacto con el suelo.</p> <p>Utilizar electroestimulación muscular.</p>                                                                                                                                                                                                                                                                                                                                                                                                                                                                                                                         |
| Debilidad de extremidades superiores                                                 | <p>Provocar actividad muscular en extremidades superiores pidiéndole al paciente que soporte peso a través de sus manos (por ejemplo, arrodillarse con 4 puntos de soporte, o mantenerse de pie con las manos descansando sobre una mesa) aguantar peso mientras se balancea o gatea</p> <p>Minimizar el desuso mantenido utilizando la extremidad superior afecta para estabilizar objetos durante tareas, por ejemplo, estabilizar el papel mientras escribe, el plato mientras come</p> <p>Practicar tareas que son familiares o importantes para el individuo, que pueden no estar asociadas con los síntomas por ejemplo, el uso del teléfono móvil, ordenador o tableta</p> <p>Estimular respuestas posturales automáticas de las extremidades superiores sentándose en una superficie inestable como la terapia con balón, apoyando las manos en la superficie de apoyo</p>     |
| Trastorno de la marcha                                                               | <p>Acelerar la marcha (en algunos casos puede empeorar el patrón de la marcha)</p> <p>Disminuir la velocidad de la marcha</p> <p>Caminar arrastrando los pies hacia adelante, manteniendo la superficie plantar del pie en contacto con el suelo (como si estuviera esquiando).</p> <p>Progresar hacia una marcha normal en pasos graduales.</p> <p>Crear un patrón de marcha normal a partir de los componentes sencillos y factibles que progresivamente se aproximen a una marcha normal. Por ejemplo – balanceo del peso corporal de lado a lado, continuar con el balanceo permitiendo que uno de los pies se adelante poco a poco “automáticamente”, incrementar de forma progresiva la longitud del paso manteniendo el foco de atención en el balanceo rítmico del cuerpo más que en la acción de dar el paso.</p> <p>Caminar aguantando en cada mano pesos/pesas pequeñas</p> |

|                                    |                                                                                                                                                                                                                                                                                                                                                                                                                                                                                                                                                                                                                                                                                                                                                                                                                                                                                                                                                                                                                                                                                                                                                                                                                                                                                                                                                                               |
|------------------------------------|-------------------------------------------------------------------------------------------------------------------------------------------------------------------------------------------------------------------------------------------------------------------------------------------------------------------------------------------------------------------------------------------------------------------------------------------------------------------------------------------------------------------------------------------------------------------------------------------------------------------------------------------------------------------------------------------------------------------------------------------------------------------------------------------------------------------------------------------------------------------------------------------------------------------------------------------------------------------------------------------------------------------------------------------------------------------------------------------------------------------------------------------------------------------------------------------------------------------------------------------------------------------------------------------------------------------------------------------------------------------------------|
|                                    | <p>Caminar hacia atrás o de lado</p> <p>Caminar a un cierto ritmo (por ejemplo al ritmo de una música, contando: 1,2,1,2...)</p> <p>Movimientos exagerados (por ejemplo, caminando con pasos altos)</p> <p>Subir y bajar escaleras (esto es, a menudo, más fácil que caminar en superficies planas)</p>                                                                                                                                                                                                                                                                                                                                                                                                                                                                                                                                                                                                                                                                                                                                                                                                                                                                                                                                                                                                                                                                       |
| Temblor en extremidades superiores | <p>Realizar el movimiento "voluntario" imitando activamente el temblor, cambiar el movimiento a una amplitud mayor y disminuir la frecuencia, luego enlentecer el movimiento hasta mantener una postura quieta</p> <p>Enseña al paciente cómo relajar los músculos contrayendo activamente sus músculos durante unos pocos segundos y luego relajando</p> <p>Cambiar posturas habituales y movimientos que faciliten la producción del temblor</p> <p>Realizar un movimiento competitivo, por ejemplo aplaudir a un ritmo o un movimiento amplio y fluido con la mano sintomática como si se dirigiera una orquesta</p> <p>Focalizarse en otra parte del cuerpo, por ejemplo realizar golpes pequeños repetitivos con la otra mano o pie</p> <p>Ejercicios de relajación muscular. Por ejemplo, técnicas de relajación muscular progresiva, biorretroalimentación con EMG desde el trapecio o usando retroalimentación con espejos</p>                                                                                                                                                                                                                                                                                                                                                                                                                                        |
| Temblor en extremidades inferiores | <p>Balaceo del peso corporal de lado a lado o hacia adelante y atrás. Cuando el temblor ha disminuido, balancear progresivamente hasta alcanzar una postura quieta</p> <p>Movimientos competitivos tales como pequeños golpes repetitivos con la punta del pie</p> <p>Asegurar la distribución correcta del peso corporal incluso en bipedestación. Esto puede ser conseguirse usando balanzas o retroalimentación con espejos</p> <p>Cambiar posturas que facilitan la producción de los síntomas. Por ejemplo, reducir apoyar el peso corporal sobre el antepié.</p>                                                                                                                                                                                                                                                                                                                                                                                                                                                                                                                                                                                                                                                                                                                                                                                                        |
| Distonía fija                      | <p>Cambiar las posturas habituales adoptadas para sentarse y levantarse para prevenir periodos largos con las articulaciones forzadas y promover posturas con alineamiento</p> <p>Normalizar patrones motores (por ejemplo, levantarse desde una silla, transferencias, caminar) con un foco de atención externo o alterado (no la extremidad distónica)</p> <p>Desaprobar conductas de evitación que no son beneficiosas y alentar experiencias sensitivas normales (por ejemplo, usar calcetines y zapatos, soporte del peso corporal si es tolerado, no mantener el brazo en una postura de "protección"</p> <p>Prevenir o abordar la hipersensibilidad y la hipervigilancia</p> <p>Enseñar estrategias para relajar los músculos hiperactivos al sentarse y acostarse (por ejemplo, permitiendo a la superficie de apoyo soportar el peso de la extremidad. Cojines o toallas dobladas pueden ser necesarias para elevar la superficie de soporte y que toque la extremidad si existen contracturas)</p> <p>El paciente puede necesitar que le enseñen cómo ser consciente de posturas maladaptativas o de los músculos hiperactivos para poder usar las estrategias</p> <p>Considerar el examen bajo anestesia, especialmente si la extremidad está completamente fija o hay sospecha de contracturas</p> <p>Considerar un ensayo con electroestimulación muscular o</p> |

|                                  |                                                                                                                                                                                                                                                                                                                                                                                                 |
|----------------------------------|-------------------------------------------------------------------------------------------------------------------------------------------------------------------------------------------------------------------------------------------------------------------------------------------------------------------------------------------------------------------------------------------------|
|                                  | electroestimulación funcional para normalizar la postura y el movimiento de la extremidad                                                                                                                                                                                                                                                                                                       |
| Sacudidas/Mioclónías funcionales | Reentrenar el movimiento puede que sea menos útil para los movimientos de sacudida intermitentes o abruptos. En cambio, busca alterar la atención sobre uno mismo o los síntomas premonitorios a la sacudida mediante la distracción o redirigiendo la atención<br>Abordar el dolor, la hiperactividad de los músculos o los patrones alterados de movimiento que pueden preceder a la sacudida |
| EMG, electromiografía            |                                                                                                                                                                                                                                                                                                                                                                                                 |
